# Supplementary material
Source: PubMed Central journal article supplement (PMC3717379)
Supplement: NIHMS462518-supplement-1_si_001.pdf [file NIHMS462518-supplement-1_si_001.pdf]

| Table 1: ATPase activity of labeled and unlabeled monocysteine SecA mutants |                                                                                  |                                                                   |                                                                        |
|-----------------------------------------------------------------------------|----------------------------------------------------------------------------------|-------------------------------------------------------------------|------------------------------------------------------------------------|
| SecA protein                                                                | Endogenous [Pi]<br>(nmole min <sup>-1</sup> μg SecA <sup>-1</sup> ) <sup>1</sup> | Membrane [Pi]<br>(nmole min <sup>-1</sup> μg SecA <sup>-1</sup> ) | Translocation [Pi]<br>(nmole min <sup>-1</sup> μg SecA <sup>-1</sup> ) |
| WT                                                                          | 0.23                                                                             | 0.37                                                              | 1.06                                                                   |
| 59C                                                                         | 0.20                                                                             | 0.06                                                              | 0.45                                                                   |
| 59C-IAE                                                                     | 0.63                                                                             | 0.22                                                              | 0.34                                                                   |
| 59C-IAN                                                                     | 0.37                                                                             | 0.06                                                              | 0.60                                                                   |
| 59C-AF568                                                                   | 0.12                                                                             | 0.08                                                              | 0.20                                                                   |
| 59C-AF647                                                                   | 0.24                                                                             | 0.07                                                              | 0.14                                                                   |
| 340C                                                                        | 0.15                                                                             | 0.09                                                              | 0.36                                                                   |
| 340C-IAE                                                                    | 0.22                                                                             | 0.08                                                              | 0.27                                                                   |
| 340C-IAN                                                                    | 0.41                                                                             | 0.23                                                              | 0.45                                                                   |
| 340C-AF488                                                                  | 0.65                                                                             | 0.16                                                              | 0.75                                                                   |
| 340C-AF568                                                                  | 0.35                                                                             | 0.09                                                              | 0.56                                                                   |
| 402C                                                                        | 0.05                                                                             | 0.12                                                              | 0.61                                                                   |
| 402C-IAE                                                                    | 0.15                                                                             | 0.15                                                              | 0.46                                                                   |
| 402C-IAN                                                                    | 0.16                                                                             | 0.19                                                              | 0.45                                                                   |
| 402C-AF488                                                                  | 0.15                                                                             | 0.09                                                              | 0.38                                                                   |
| 402C-AF568                                                                  | 0.16                                                                             | 0.01                                                              | 0.36                                                                   |
| 427C                                                                        | 0.01                                                                             | 0.06                                                              | 0.33                                                                   |
| 427C-IAE                                                                    | 0.23                                                                             | 0.08                                                              | 0.35                                                                   |
| 427C-IAN                                                                    | 0.20                                                                             | 0.15                                                              | 0.15                                                                   |
| 427C-AF488                                                                  | 0.98                                                                             | -0.08                                                             | 0.09                                                                   |
| 427C-AF568                                                                  | 0.71                                                                             | 0.04                                                              | -0.01                                                                  |
| 427C-AF647                                                                  | 0.43                                                                             | 0.10                                                              | -0.02                                                                  |
| 458C                                                                        | 0.19                                                                             | 0.09                                                              | 0.64                                                                   |
| 458C-AF488                                                                  | 0.28                                                                             | 0.00                                                              | 0.46                                                                   |
| 458C-AF568                                                                  | 0.31                                                                             | 0.01                                                              | 0.10                                                                   |
| 470C                                                                        | 0.07                                                                             | 0.44                                                              | 1.30                                                                   |
| 470C-IAE                                                                    | 1.08                                                                             | 0.08                                                              | 0.40                                                                   |
| 470C-IAN                                                                    | 1.26                                                                             | -0.12                                                             | 0.14                                                                   |
| 470C-AF488                                                                  | 0.41                                                                             | 0.72                                                              | 0.31                                                                   |
| 470C-AF568                                                                  | 0.73                                                                             | 0.76                                                              | 1.47                                                                   |
| 470C-AF647                                                                  | 0.40                                                                             | 0.02                                                              | 0.38                                                                   |
| 506C                                                                        | 0.16                                                                             | 0.22                                                              | 0.77                                                                   |
| 506C-AF488                                                                  | 1.51                                                                             | 0.11                                                              | 0.76                                                                   |
| 506C-AF568                                                                  | 0.88                                                                             | 0.55                                                              | 0.59                                                                   |
| 506C-AF647                                                                  | 1.32                                                                             | 0.14                                                              | 0.74                                                                   |
| 696C                                                                        | 0.13                                                                             | 0.15                                                              | 0.30                                                                   |
| 696C-IAE                                                                    | 0.15                                                                             | 0.10                                                              | 0.50                                                                   |
| 696C-IAN                                                                    | 0.11                                                                             | 0.15                                                              | 0.40                                                                   |
| 696C-AF488                                                                  | 0.23                                                                             | 0.12                                                              | 0.52                                                                   |
| 696C-AF568                                                                  | 0.18                                                                             | 0.06                                                              | 0.36                                                                   |
| 696C-AF647                                                                  | 0.34                                                                             | 0.09                                                              | 0.49                                                                   |
| 734C                                                                        | 0.20                                                                             | 0.29                                                              | 1.06                                                                   |
| 734C-IAE                                                                    | 1.07                                                                             | 0.11                                                              | 0.69                                                                   |
| 734C-IAN                                                                    | 0.53                                                                             | 0.35                                                              | 0.52                                                                   |
| 734C-AF488                                                                  | 0.34                                                                             | 0.04                                                              | 0.06                                                                   |
| 734C-AF568                                                                  | 0.14                                                                             | 0.01                                                              | 0.06                                                                   |
| 734C-AF647                                                                  | 0.31                                                                             | 0.08                                                              | 0.20                                                                   |

<sup>1</sup>Errors are not reported as they are 10% or less of the measured value.

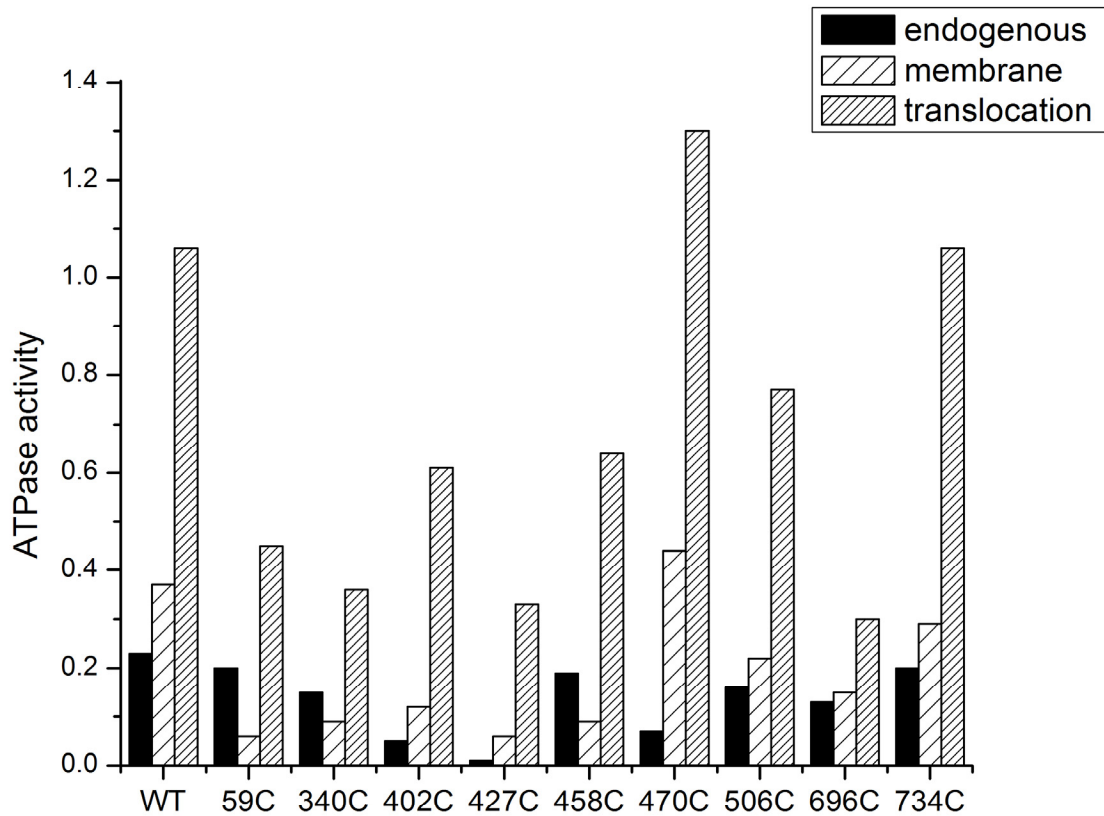

Figure 1: ATPase activity of monocysteine SecA mutants. ATPase activity was calculated using the following formulas: endogenous ATPase activity is the ATPase activity in the presence of SecA after subtracting ATPase activity in the absence of SecA; membrane ATPase activity is the ATPase activity in the presence of SecA and IMV after subtracting the endogenous ATPase activity; translocation ATPase activity is the ATPase activity in the presence of SecA, IMV, and preprotein after subtracting membrane ATPase activity.

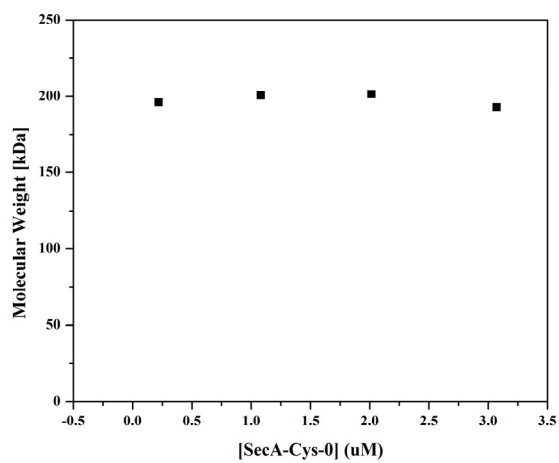

Figure 2. Assessment of SecA oligomeric state. Measurement of the weight average molecular mass (Molecular Weight) of SecA-OC at the indicated protein concentration in TKE buffer was performed by SEC and static light scattering as described in “Experimental Procedures”.

| Table 2: Donor Quantum Yields ( $\Phi_D$ ) <sup>1</sup> and Associated $R_0$ values <sup>2</sup>                                                                                                                                                                                                                                                                                                                                                                           |          |           |
|----------------------------------------------------------------------------------------------------------------------------------------------------------------------------------------------------------------------------------------------------------------------------------------------------------------------------------------------------------------------------------------------------------------------------------------------------------------------------|----------|-----------|
| FRET Pair                                                                                                                                                                                                                                                                                                                                                                                                                                                                  | $\Phi_D$ | $R_0$ (Å) |
| 59IAE-59IAN                                                                                                                                                                                                                                                                                                                                                                                                                                                                | 0.05     | 31        |
| 59AF568-59AF657                                                                                                                                                                                                                                                                                                                                                                                                                                                            | 0.76     | 84        |
| 402IAE-402IAN                                                                                                                                                                                                                                                                                                                                                                                                                                                              | 0.10     | 34        |
| 402AF488-402AF568                                                                                                                                                                                                                                                                                                                                                                                                                                                          | 0.16     | 48        |
| 59IAE-402IAN                                                                                                                                                                                                                                                                                                                                                                                                                                                               | 0.05     | 31        |
| 340IAE-340IAN                                                                                                                                                                                                                                                                                                                                                                                                                                                              | 0.01     | 22        |
| 340AF488-340AF568                                                                                                                                                                                                                                                                                                                                                                                                                                                          | 0.51     | 56        |
| 427IAE-427IAN                                                                                                                                                                                                                                                                                                                                                                                                                                                              | 0.08     | 33        |
| 427AF488-427AF568                                                                                                                                                                                                                                                                                                                                                                                                                                                          | 0.21     | 51        |
| 427AF568-427AF647                                                                                                                                                                                                                                                                                                                                                                                                                                                          | 0.09     | 57        |
| 458AF488-458AF568                                                                                                                                                                                                                                                                                                                                                                                                                                                          | 0.63     | 59        |
| 470IAE-470IAN                                                                                                                                                                                                                                                                                                                                                                                                                                                              | 0.08     | 33        |
| 470AF488-470AF568                                                                                                                                                                                                                                                                                                                                                                                                                                                          | 0.58     | 59        |
| 470AF568-470AF647                                                                                                                                                                                                                                                                                                                                                                                                                                                          | 0.58     | 79        |
| 506AF488-506AF568                                                                                                                                                                                                                                                                                                                                                                                                                                                          | 0.67     | 61        |
| 506AF568-506AF647                                                                                                                                                                                                                                                                                                                                                                                                                                                          | 0.52     | 78        |
| 696IAE-696IAN                                                                                                                                                                                                                                                                                                                                                                                                                                                              | 0.15     | 37        |
| 696AF488-696AF548                                                                                                                                                                                                                                                                                                                                                                                                                                                          | 0.69     | 62        |
| 696AF568-696AF647                                                                                                                                                                                                                                                                                                                                                                                                                                                          | 0.52     | 78        |
| 734AF568-743AF647                                                                                                                                                                                                                                                                                                                                                                                                                                                          | 0.68     | 81        |
| <sup>1</sup> The quantum yield of IAE-labeled SecA was measured relative to quinine sulfate ( $\Phi = 0.56$ ), the quantum yield of AF488-labeled SecA was measured relative to fluorescein ( $\Phi = 0.925$ ) (Magde <i>et al.</i> 2002), and the quantum yield of AF568-labeled SecA was measured relative to cresyl violet ( $\Phi = 0.54$ ) (Magde <i>et al.</i> 1979). <sup>2</sup> $R_0$ values were calculated as previously described (Auclair <i>et al.</i> 2010) |          |           |

| Table 3: Evaluation of $\kappa^2$ Distributions and Effect on Distances using Steady State Anisotropy Values |         |         |                  |                  |                   |
|--------------------------------------------------------------------------------------------------------------|---------|---------|------------------|------------------|-------------------|
| FRET pair                                                                                                    | $r_d^1$ | $r_a^1$ | $\kappa^2_{min}$ | $\kappa^2_{max}$ | $\Delta R_{DA}^2$ |
| 59IAE-59IAN                                                                                                  | 0.09    | 0.15    | 0.31             | 1.95             | -12.1...+19.6 %   |
| 59AF568-AF647                                                                                                | 0.19    | 0.20    | 0.20             | 2.57             | -18.1...+25.2%    |
| 402IAE-402IAN                                                                                                | 0.15    | 0.15    | 0.26             | 2.23             | -14.6...+22.3%    |
| 402AF488-402AF568                                                                                            | 0.16    | 0.18    | 0.23             | 2.38             | -16.1...+23.6%    |
| 59IAE-402IAN                                                                                                 | 0.09    | 0.15    | 0.31             | 1.95             | -12.1...+19.6%    |
| 340IAE-340IAN                                                                                                | 0.15    | 0.20    | 0.23             | 2.38             | -16.1...+23.6%    |
| 340AF488-340AF568                                                                                            | 0.15    | 0.20    | 0.22             | 2.42             | -16.5...+23.9%    |
| 427AF488-427AF568                                                                                            | 0.18    | 0.16    | 0.23             | 2.42             | -16.5...+24.0%    |
| 427AF568-427AF647                                                                                            | 0.16    | 0.19    | 0.22             | 2.46             | -16.9...+24.3%    |
| 458AF488-458AF568                                                                                            | 0.18    | 0.16    | 0.26             | 2.19             | -14.2...+22.0%    |
| 470AF488-470AF568                                                                                            | 0.18    | 0.17    | 0.25             | 2.26             | -14.9...+22.6%    |
| 470AF568-470AF647                                                                                            | 0.17    | 0.22    | 0.20             | 2.54             | -17.8...+25.0%    |
| 506AF488-506AF568                                                                                            | 0.13    | 0.18    | 0.25             | 2.25             | -14.9...+22.5%    |
| 506AF568-506AF647                                                                                            | 0.18    | 0.22    | 0.19             | 2.61             | -18.5...+25.5%    |
| 696AF488-696AF568                                                                                            | 0.15    | 0.18    | 0.24             | 2.34             | -15.7...+23.3%    |
| 696AF568-696AF647                                                                                            | 0.18    | 0.19    | 0.21             | 2.51             | -17.4...+24.7%    |
| 734AF568-734AF647                                                                                            | 0.18    | 0.19    | 0.21             | 2.51             | -17.4...+24.7%    |

<sup>1</sup>Anisotropy values are reported for donor only or acceptor only solutions. <sup>2</sup>Percent error of distances calculated with  $\kappa^2$  range relative to those calculated with  $\kappa^2=2/3$ .

The  $\kappa^2_{min}$  and  $\kappa^2_{max}$  values were calculated using the following equations (Ivanov *et al.* 2009):

$$\kappa^2_{min} = \frac{2}{3} \left( 1 - \frac{\left( \sqrt{\frac{5}{2}} r_d + \sqrt{\frac{5}{2}} r_a \right)}{2} \right)$$

$$\kappa^2_{max} = \frac{2}{3} \left( 1 + \sqrt{\frac{5}{2}} r_d + \sqrt{\frac{5}{2}} r_a + 3 \sqrt{\frac{5}{2}} r_d \sqrt{\frac{5}{2}} r_a \right)$$

where  $r_d$  and  $r_a$  are the steady state anisotropy values determined for donor only and acceptor only species.

The  $\kappa^2_{min}$  and  $\kappa^2_{max}$  values were used to estimate the error in the distance resulting from assuming an orientation factor of 2/3 using the following equation:

$$\Delta = \sqrt[6]{\frac{\kappa^2}{2/3}}$$

where  $\Delta = \frac{R}{R_{app}}$  and  $R_{app}$  is the apparent distance calculated for the case when  $\kappa^2=2/3$ . These orientation factor errors were considered with measurement errors when reporting the uncertainties in FRET distance measurements in Table 1.

- Auclair, S., Moses, J., Musial-Siwiek, M., Kendall, D., Oliver, D. and Mukerji, I. (2010). "Mapping of the Signal Peptide-Binding Domain of Escherichia Coli SecA Using Forster Resonance Energy Transfer." *Biochemistry* **49**: 782-792.
- Ivanov, V., Li, M. and Mizuuchi, K. (2009). "Impact of Emission Anisotropy on Fluorescence Spectroscopy and Fret Distance Measurements." *Biophys J* **97**(3): 922-929.
- Magde, D., Brannon, J. H., Cremers, T. L. and Olmsted, J. (1979). "Absolute Luminescence Yield of Cresyl Violet. A Standard for the Red." *J. Phys. Chem.* **83**: 693-699.
- Magde, D., Wong, R. and Seybold, P. G. (2002). "Fluorescence Quantum Yields and Their Relation to Lifetimes of Rhodamine 6g and Fluorescein in Nine Solvents: Improved Absolute Standards for Quantum Yields." *Photochem. Photobiol.* **75**: 327-334.
